# Supplementary material
Source: HighWire-hosted journal article supplement (https://cmaj.ca/highwire/filestream/149498/field_highwire_adjunct_files/0/221318-res-1-at.pdf)
Supplement: 221318-res-1-at.pdf [file 221318-res-1-at.pdf]

| <b>eTable 1.</b> Definitions of study measures using International Classification of Diseases diagnostic codes. |                                                                                                                                         |                                                                                                                                                                                                                                            |                                                                 |
|-----------------------------------------------------------------------------------------------------------------|-----------------------------------------------------------------------------------------------------------------------------------------|--------------------------------------------------------------------------------------------------------------------------------------------------------------------------------------------------------------------------------------------|-----------------------------------------------------------------|
| <b>Measure</b>                                                                                                  | <b>Ontario Mental Health Reporting System (ICD-9-CM/ICD-10-CM)</b>                                                                      | <b>Canadian Institute for Health Information's Discharge Abstract Database/National Ambulatory Care Reporting System (ICD-10-CA)</b>                                                                                                       | <b>Ontario Health Insurance Plan dataset (ICD-8)</b>            |
| <b>Eating disorder-related acute care visits</b>                                                                |                                                                                                                                         |                                                                                                                                                                                                                                            |                                                                 |
| Anorexia Nervosa                                                                                                | 307.1 (anorexia nervosa)                                                                                                                | F50.0 (anorexia nervosa)                                                                                                                                                                                                                   | Not applicable                                                  |
| Bulimia Nervosa                                                                                                 | 307.51 (bulimia nervosa)                                                                                                                | F50.2 (bulimia nervosa)                                                                                                                                                                                                                    | Not applicable                                                  |
| Other Eating Disorder                                                                                           | 307.50 (eating disorder not otherwise specified)<br>307.52 (pica)<br>307.53 (rumination disorder)<br>307.59 (other disorders of eating) | F50.1 (atypical anorexia nervosa)<br>F50.3 (atypical bulimia nervosa)<br>F50.8 (Other eating disorders)<br>F50.9 (Eating disorder, unspecified)<br>F98.2 (Feeding disorder of infancy and childhood) F98.3 (Pica of infancy and childhood) | Not applicable                                                  |
| Provisional diagnoses (not categorized)                                                                         | 12 (DSM-4 - Eating Disorder)<br>10 (DSM-5 - Feeding and eating disorders)                                                               | Not applicable                                                                                                                                                                                                                             | Not applicable                                                  |
| <b>Covariates</b>                                                                                               |                                                                                                                                         |                                                                                                                                                                                                                                            |                                                                 |
| Recent pre-existing mental health-related concern (2-year look back)                                            | <u>For 2017 through March 2019</u> : Any visit except those with a primary diagnosis of 290 or 294.                                     | Any visit with the primary diagnosis of F06-F99 or any visit with X60-X84, Y10-Y19, Y28 as a secondary diagnosis                                                                                                                           | 295-298, 300-304, 306, 309, 311, 897-899, 900-902, 904-906, 909 |

|                                             |                                                                                                                                                                                                                                                                                                                   |                                             |  |
|---------------------------------------------|-------------------------------------------------------------------------------------------------------------------------------------------------------------------------------------------------------------------------------------------------------------------------------------------------------------------|---------------------------------------------|--|
|                                             | <p><u>For April 2019 onwards:</u><br/>Any visit identified except for visits with neurocognitive disorders as the primary diagnosis (F01.50, F01.51, F02.80, F02.81, F05, G31.84, G31.9, R41.0, R41.9).</p> <p>For all years, we excluded visits with no primary diagnosis and a provisional diagnosis of 17.</p> | when the primary diagnosis was not F06-F99. |  |
| History of an eating disorder-related visit | This was defined using the same definitions listed above with a 2-year lookback as well as a lookback to 2002.                                                                                                                                                                                                    |                                             |  |

Abbreviations: ICD-9-CM = International Statistical Classification of Diseases, 9<sup>th</sup> revision, with clinical modifications; ICD-10-CM = International Statistical Classification of Diseases, 10<sup>th</sup> revision, with clinical modifications; ICD-10-CA = International Statistical Classification of Diseases, 10<sup>th</sup> revision, with Canadian enhancements; ICD-8 = International Statistical Classification of Diseases, 8<sup>th</sup> revision; DSM-4 = Diagnostic and Statistical Manual of Mental Disorders, 4<sup>th</sup> edition; DSM-5 = Diagnostic and Statistical Manual of Mental Disorders, 5<sup>th</sup> edition
